# Supplementary material for: Anti-CD45RC antibody immunotherapy prevents and treats experimental autoimmune polyendocrinopathy–candidiasis–ectodermal dystrophy syndrome
Source: JCI journal article supplement (doi:10.1172/jci156507), 2022-02-15
Supplement: sd1 [file 1]

Suppl. Figure 1. Besnard et al.

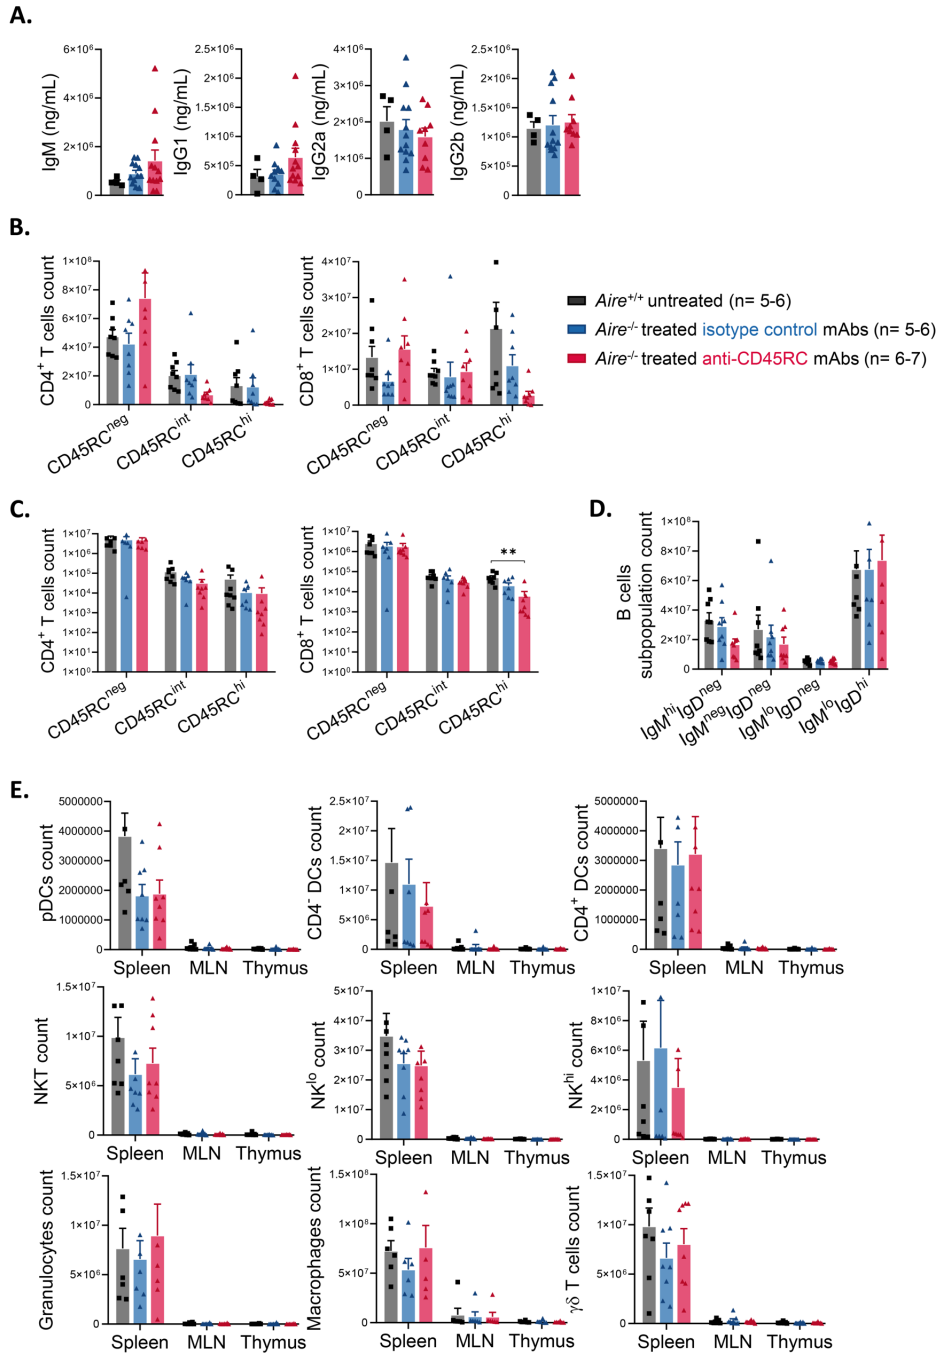

**Suppl. Figure 1: Anti-CD45RC mAbs specifically depletes CD45RC<sup>+</sup> effector T cells. (A)** IgM and IgG subtypes 1, 2a and 2b concentration were assessed by ELISA in sera from isotype control or anti-CD45RC mAbs-treated *Aire*<sup>-/-</sup> rats compared to *Aire*<sup>+/+</sup> animals taken at the end of the four-month period of treatment. Results are shown as mean ± SEM. CD45RC expression on

CD4<sup>+</sup> (left) and CD8<sup>+</sup> (right) T cells were analyzed on splenocytes (**B**) and thymocytes (**C**) from *Aire*<sup>+/+</sup> and *Aire*<sup>-/-</sup> rats after 4 months of treatment with the isotype control or anti-CD45RC mAbs. (**D**) B cells subpopulations in the spleen of *Aire*<sup>+/+</sup> and *Aire*<sup>-/-</sup> rats at the end of the treatment. (**E**) Phenotyping by flow cytometry of immune cells from spleen, MLN and thymus of *Aire*<sup>+/+</sup> and *Aire*<sup>-/-</sup> treated rats. \*\*, p<0.01.

Suppl. Figure 2. Besnard et al.

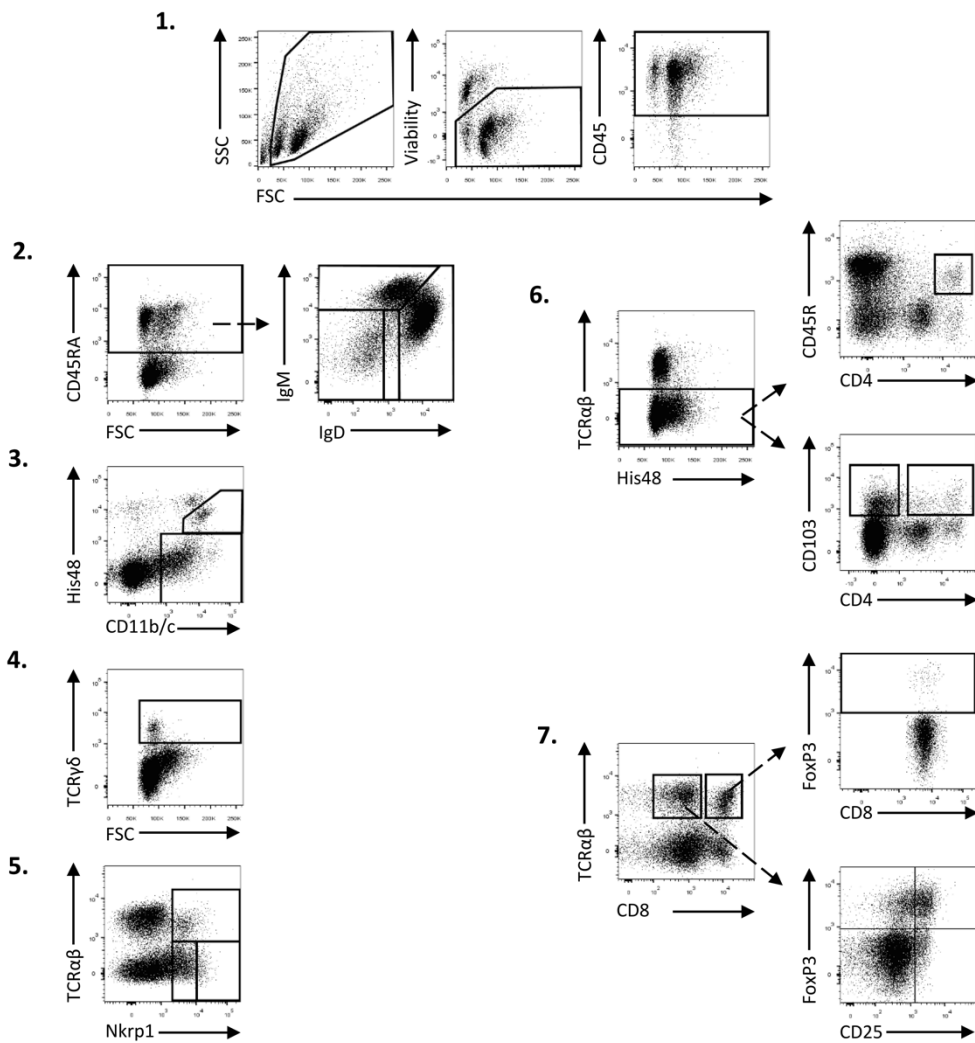

**Suppl. Figure 2: Gating strategy for immune cell phenotyping.** (1) Dot plot of the first gates common to each cell populations. Specific gating strategies for (2) B cell subpopulations, (3) granulocytes and macrophages, (4)  $\gamma\delta$ T cells, (5) NK, (6) dendritic cells and (7) Treg populations.

**Suppl. Table I. Antibody used to define rat immune cells**

| <b>Marker</b> | <b>Clone</b> | <b>Provider</b> |
|---------------|--------------|-----------------|
| CD4           | OX35         | BD Biosciences  |
| CD8           | OX8          | In-house        |
| CD25          | OX39         | In-house        |
| CD40          | HM 40-3      | BD Biosciences  |
| CD45          | OX1-OX30     | BD Biosciences  |
| CD45R         | His24        | BD Biosciences  |
| CD45RA        | OX33         | In-house        |
| CD45RC        | OX22         | In-house        |
|               | 3H1437       | SantaCruz       |
| CD80          | 3H5          | BD Biosciences  |
| CD103         | OX62         | In-house        |
| CD127         | Polyclonal   | Thermofisher    |
| CD161         | 3.2.3        | In-house        |
| 85C7          | 85C7 FX      | In-house        |
| FoxP3         | Fkj-16s      | Thermofisher    |
| IgM           | MARM-4       | Biorad          |
| IgD           | MARD         | Biorad          |
| TCRab         | R7/3         | BD Biosciences  |
| TCRgd         | V65          | In-house        |

**Suppl. Table II. Antibody used to stain human cells**

| <b>Marker</b> | <b>Clone</b> | <b>Provider</b> |
|---------------|--------------|-----------------|
| CD3           | UCHT1        | BD Biosciences  |
| CD4           | SK3          | BD Biosciences  |
| CD27          | M-T271       | BD Biosciences  |
| CD28          | CD28.2       | BD Biosciences  |
| CD45RA        | HI100        | BD Biosciences  |
| CD45RC        | MT2          | IQ-products     |
| CD103         | Ber-ACT8     | BD Biosciences  |
| CD127         | hIL-7R-M21   | BD Biosciences  |
| CD154         | TRAP1        | BD Biosciences  |
| CD279         | EH12.1       | BD Biosciences  |
| FoxP3         | 259D/C7      | BD Biosciences  |
| GITR          | REA841       | Miltenyi        |
| HLA-DR        | L243         | BD Biosciences  |
| IFN $\gamma$  | B27          | BD Biosciences  |
| IL-10         | JES3-9D7     | BD Biosciences  |
| IL-34         | IC5265P      | R&D Systems     |
| Tbet          | O4-46        | BD Biosciences  |
| TGF $\beta$ 1 | TW4-9E7      | BD Biosciences  |
